# Supplementary material for: Dynamic of the Soil Microbiota in Short-Term Crop Rotation
Source: MDPI journal article supplement (doi:10.3390/life13020400), 2023-02-01
Supplement: s1 [file s1]

Supplementary Table S1. Connection between microbial richness (Observed ASVs) and culture of plants, phase I. ANOVA results.

|           | <b>Df</b> | <b>SumSq</b> | <b>MeanSq</b> | <b>F</b> | <b>p-value</b> |
|-----------|-----------|--------------|---------------|----------|----------------|
| Culture   | 5         | 841473       | 168295        | 14.04    | 2.62e-11       |
| Residuals | 154       | 1845891      | 11986         |          |                |

Supplementary Table S2. Connection between Bray-Curtis distances and culture of plants, phase I. PERMANOVA results.

|           | <b>Df</b> | <b>SumSq</b> | <b>R2</b> | <b>F</b> | <b>p-value</b> |
|-----------|-----------|--------------|-----------|----------|----------------|
| Culture   | 5         | 1.2226       | 0.07602   | 2.5342   | 0.001          |
| Residuals | 154       | 14.8587      | 0.92398   |          |                |
| Total     | 159       | 16.0812      | 1.00000   |          |                |

Number of permutation – 999.

Supplementary Table S3. Connection between microbial richness (Observed ASVs) and culture of plants, phase II. ANOVA results.

|                                 | <b>Df</b> | <b>SumSq</b> | <b>MeanSq</b> | <b>F</b> | <b>p-value</b> |
|---------------------------------|-----------|--------------|---------------|----------|----------------|
| SecondaryCulture                | 4         | 26067        | 6517          | 0.868    | 0.4852         |
| PrimaryCulture                  | 4         | 526666       | 131667        | 17.538   | 2.06e-11       |
| SecondaryCulture:PrimaryCulture | 16        | 237302       | 14831         | 1.976    | 0.0197         |
| Residuals                       | 123       | 923405       | 7507          |          |                |

Supplementary Table S4. Connection between Bray-Curtis distances and culture of plants, phase II. PERMANOVA results.

|                                 | <b>Df</b> | <b>SumSq</b> | <b>R2</b> | <b>F</b> | <b>p-value</b> |
|---------------------------------|-----------|--------------|-----------|----------|----------------|
| PrimaryCulture                  | 4         | 0.9838       | 0.06442   | 2.1765   | 0.001          |
| SecondaryCulture                | 4         | 0.6474       | 0.04239   | 1.7903   | 0.001          |
| PrimaryCulture:SecondaryCulture | 16        | 1.7086       | 0.11187   | 1.1812   | 0.001          |
| Residual                        | 123       | 11.9335      | 0.78133   |          |                |
| Total                           | 147       | 15.2734      | 1.00000   |          |                |

Number of permutation – 999
